# Supplementary material for: The mitochondrial fission protein Drp1 in liver is required to mitigate NASH and prevents the activation of the mitochondrial ISR
Source: PubMed Central journal article supplement (PMC9420962; doi:10.1016/j.molmet.2022.101566), 2022-08-06
Supplement: mmc2.pdf [file mmc2.pdf]

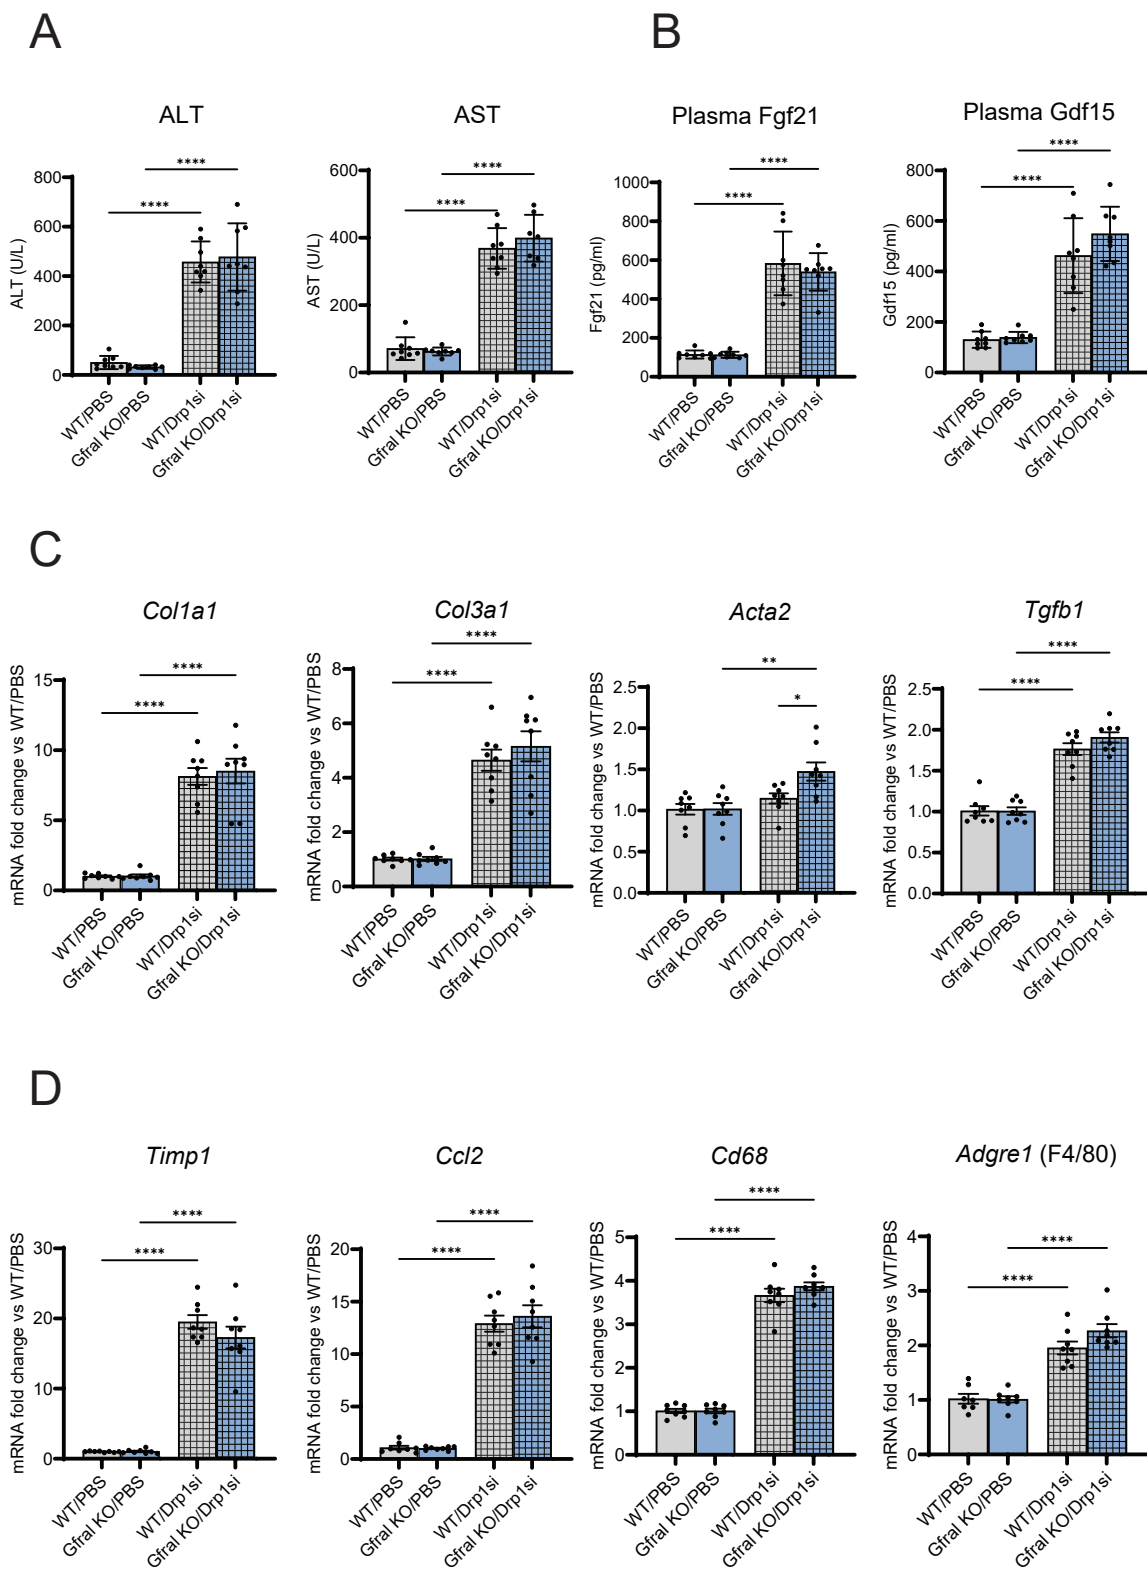

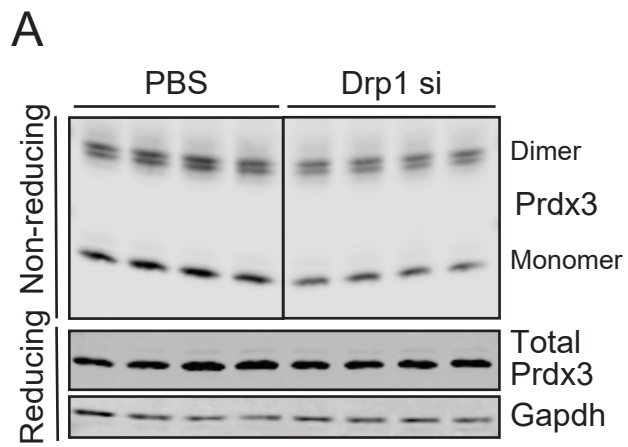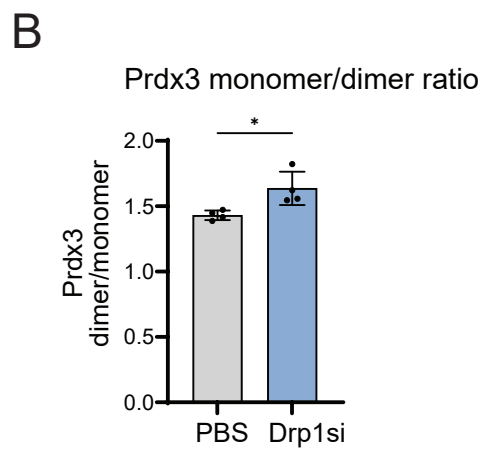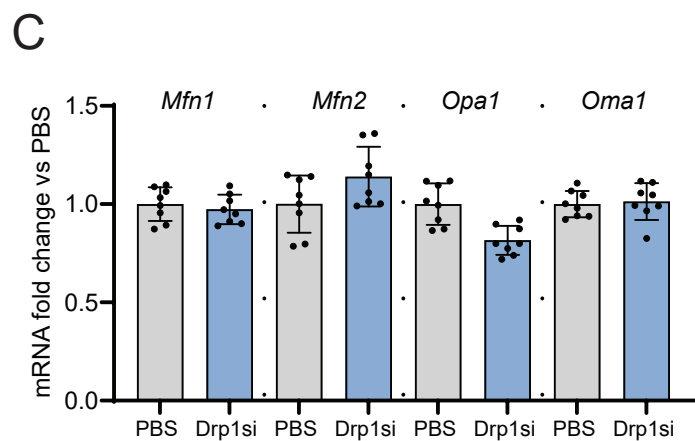

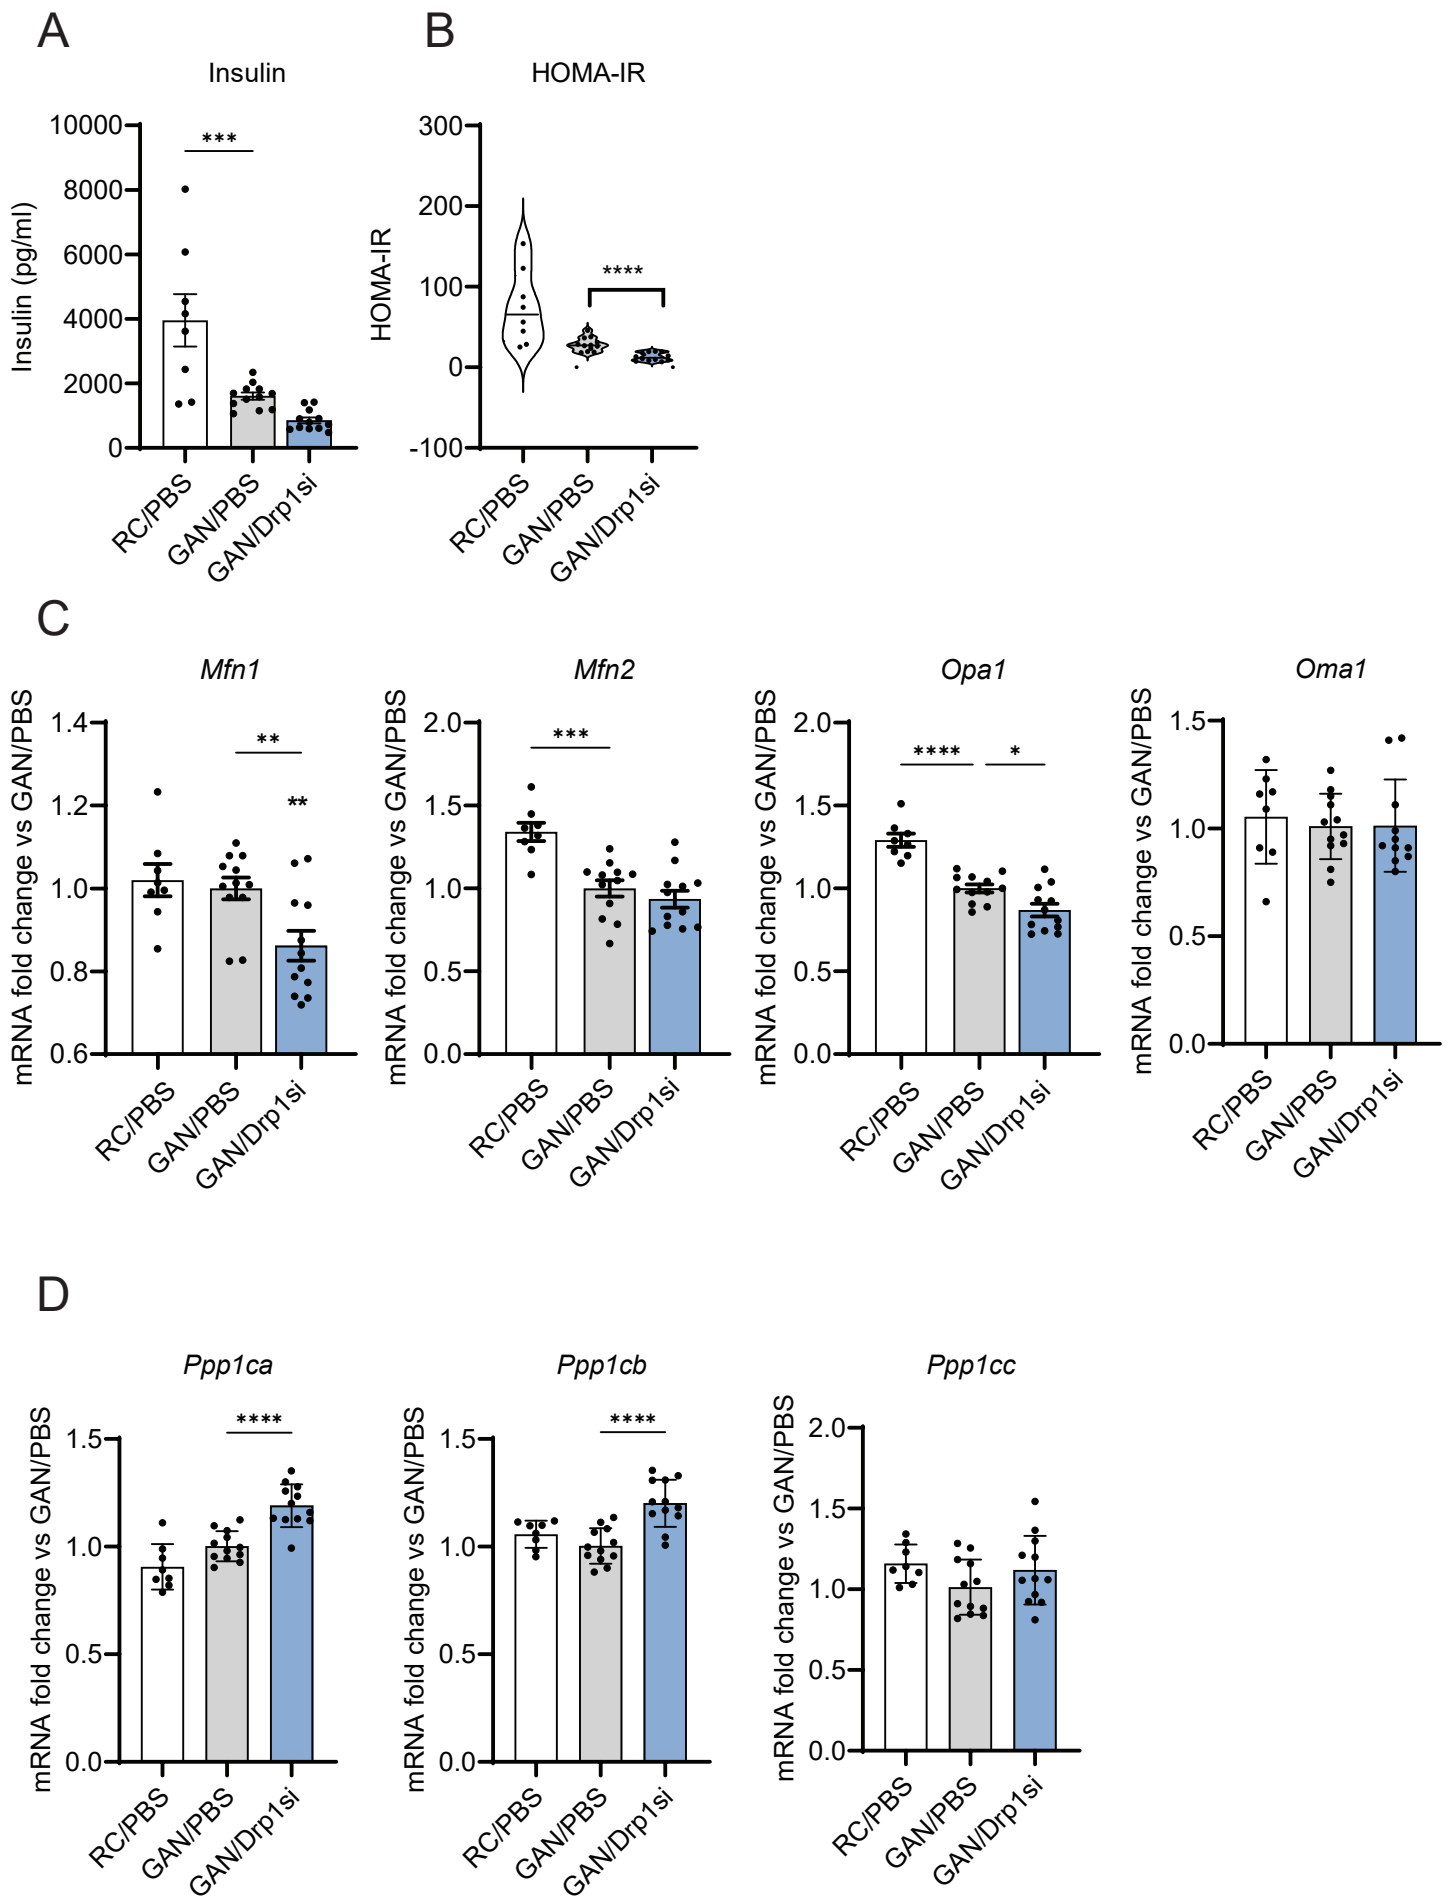

**Supplementary Figure 3**
